# Supplementary figures and images for: Control of Magnetic Properties of NiMn2O4 by a Microwave Magnetic Field under Air
Source: MDPI journal article supplement (doi:10.3390/ma9030169), 2016-03-04

Pre-NiMn<sub>2</sub>O<sub>4</sub>

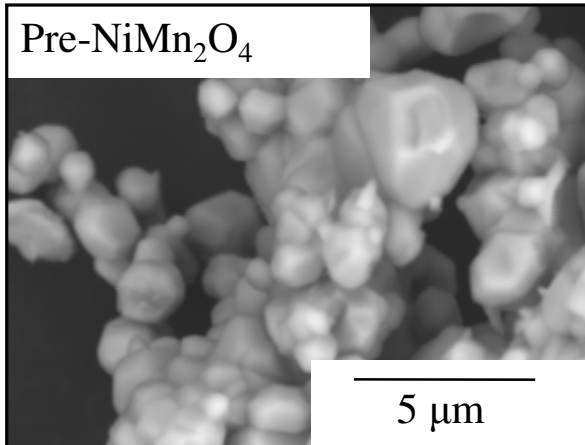

H-field irradiated sample  
(850 °C、10 min)

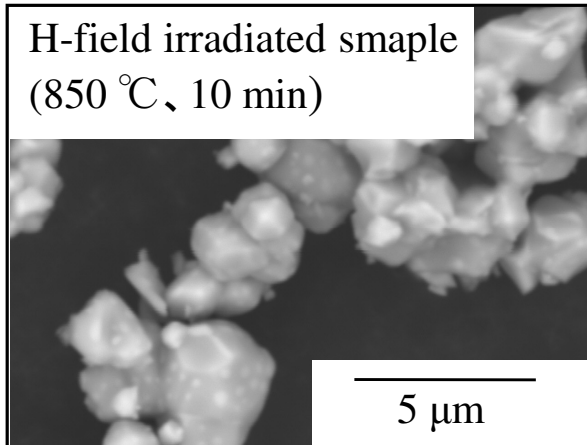

conv.-heated sample  
(850 °C、6 h)

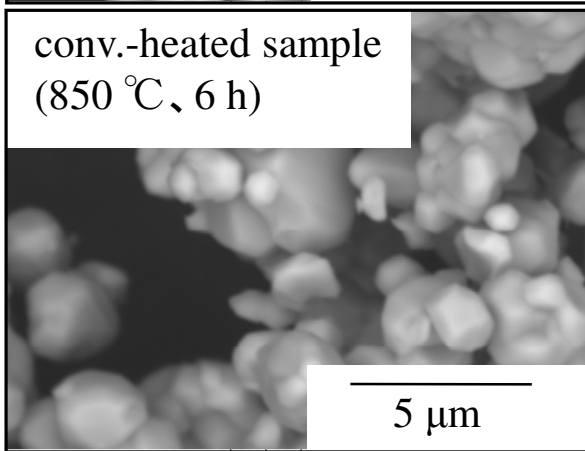

Supplement: s1 [file s1]

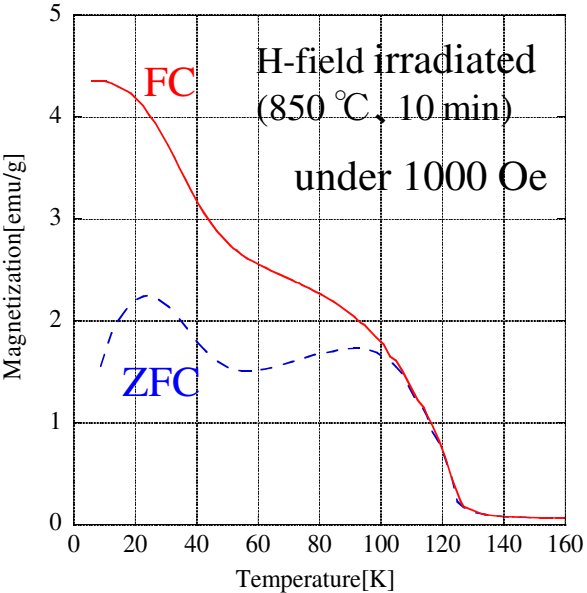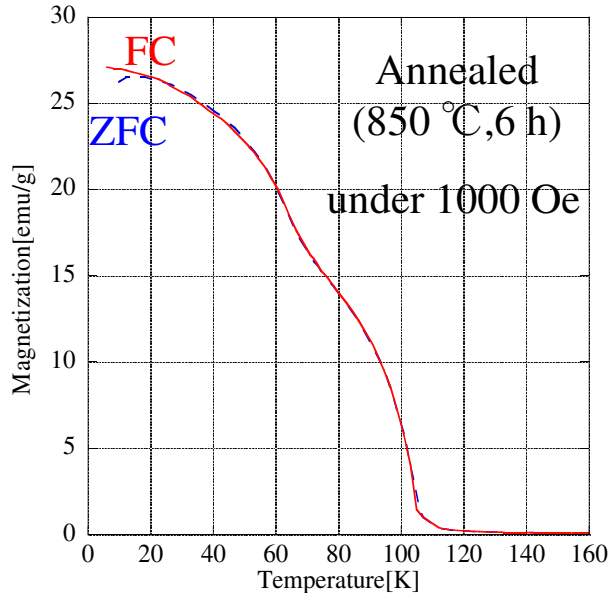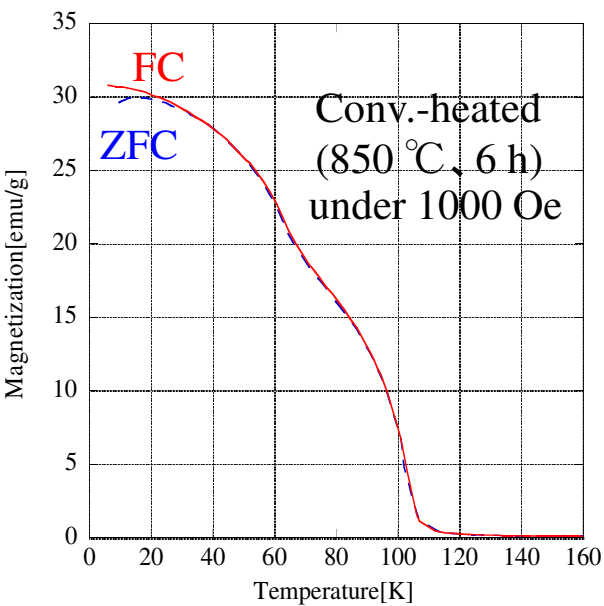

Supplement: s1 [file s1]
